# Supplementary material for: Controlled one-step fabrication of highly oriented ZnO nanoneedle/nanorods arrays at near room temperature
Source: Royal Society of Chemistry journal article supplement (doi:10.1039/b516497d), 2006-01-01
Supplement: b516497d.pdf [file b516497d.pdf]

## Supporting Information

# Controlled One-step Fabrication of Highly Oriented ZnO Nanoneedles/nanorods Array at Near Room Temperature

Xufeng Wu, Hua Bai, Chun Li, Gewu Lu and Gaoquan Shi

*Department of Chemistry and Key Lab of Bio-organic Phosphorous, Tsinghua*

*University, Beijing 100084, People's Republic of China, Email: gshi@tsinghua.edu.cn*

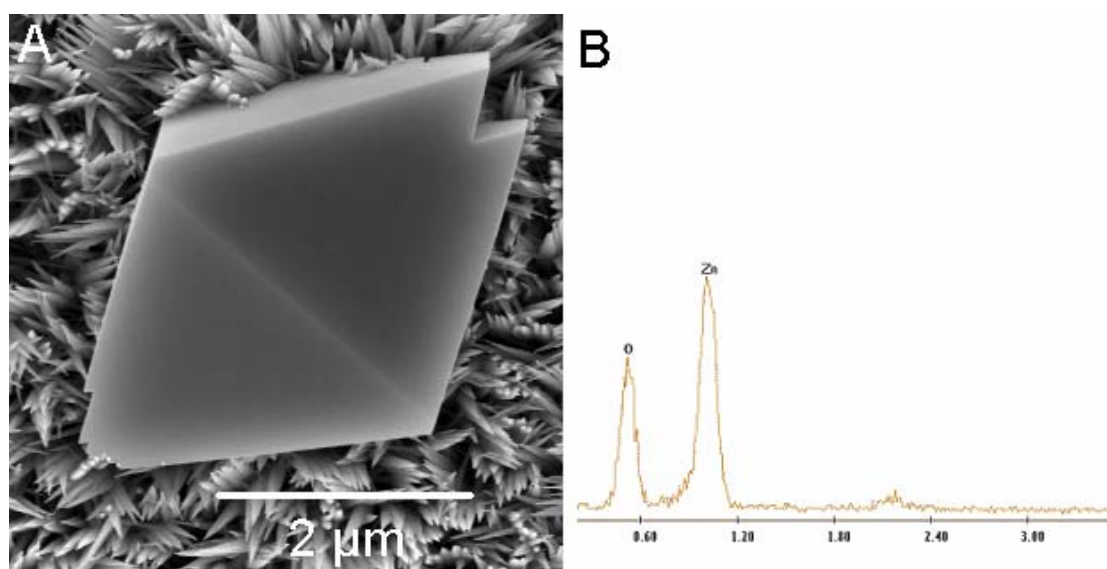

**Figure S1.** A) SEM image of an orthorhombic Zn(OH)<sub>2</sub> crystal on the ZnO nanoneedles array (20 °C, 12 h); B) EDS of the Zn(OH)<sub>2</sub> crystal reveals that atomic ratio of Zn : O = 1:2.

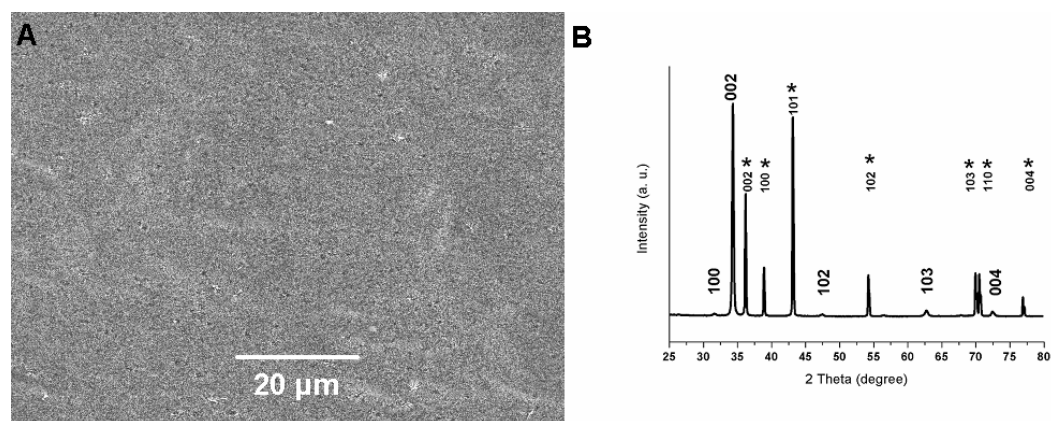

**Figure S2.** A Large scale SEM(A) and XRD(B) pattern of ZnO nanoneedles array (20  $^{\circ}\text{C}$ , 12 h) after sonication in potassium hydroxide aqueous solution for 5 second.  $\text{Zn}(\text{OH})_2$  nanocrystal can be removed thoroughly.

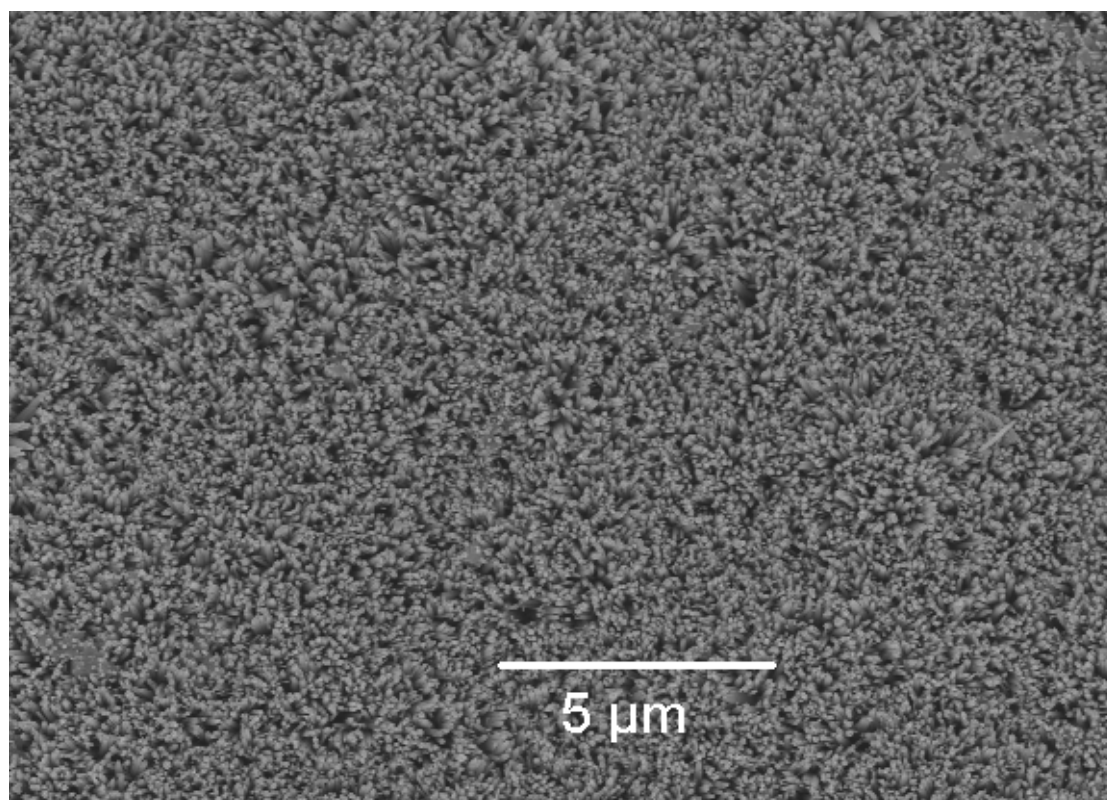

**Figure S3.** A large area view of as-prepared nanorods array generated at 30  $^{\circ}\text{C}$  for 12h.

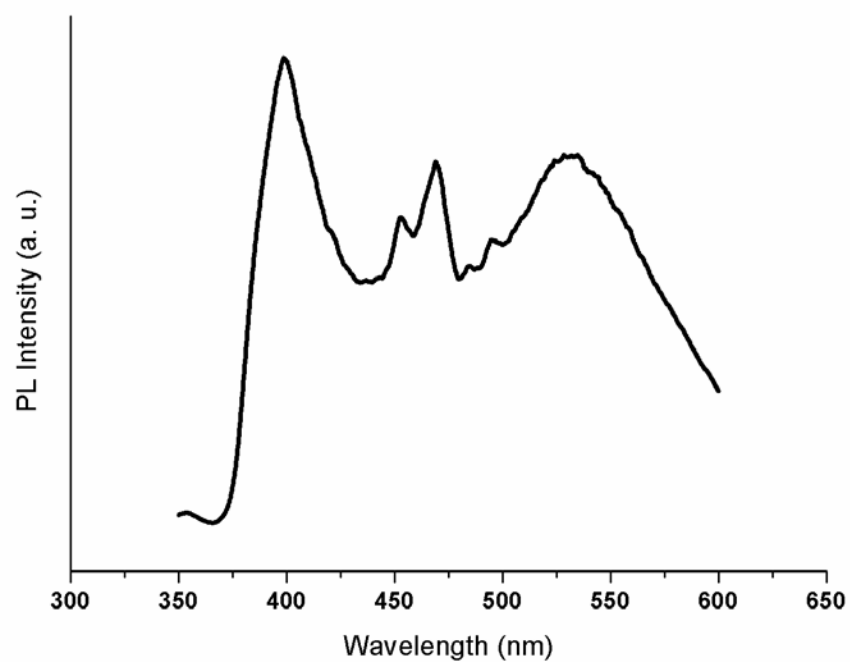

**Figure S4.** Room-temperature photoluminescence spectrum of as-prepared ZnO nanoneedles array. (20 °C, 12 h)

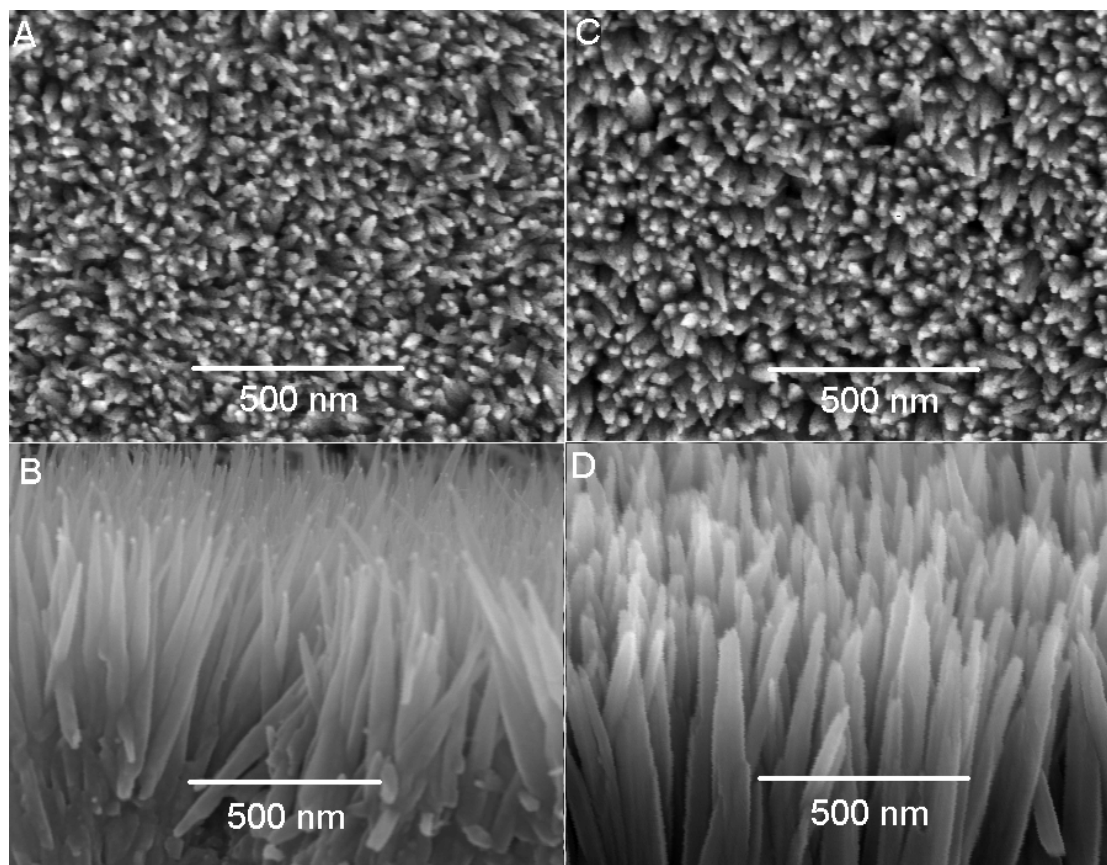

**Figure S5.** SEM images of the zinc foil surfaces after reaction in an alkali zincate solution at different temperature and for different time. A) 20 °C□15 min; B) 20 °C□300 min; C) 30 °C□15 min; D) 30 °C□300 min.

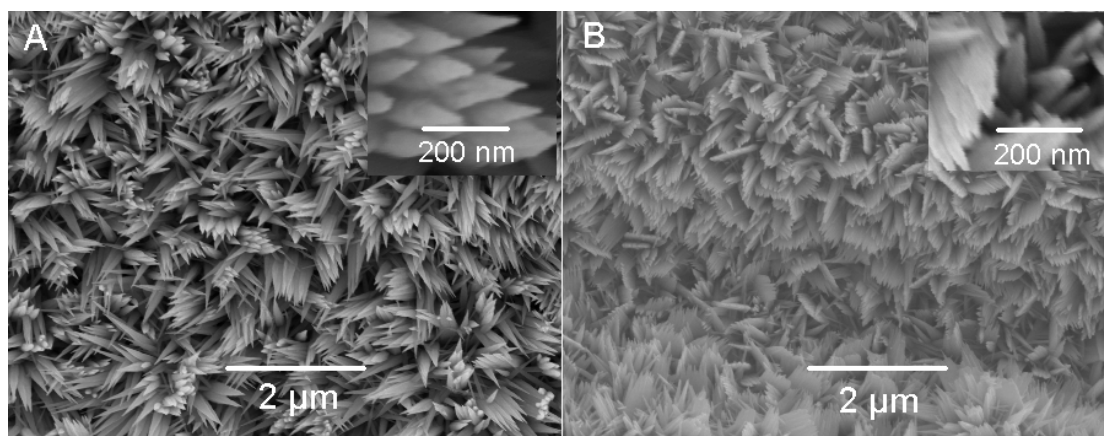

**Figure S6.** SEM images of a zinc foil freshly pretreated by two different methods after reaction at 20 °C for 5 h. A) reacted with 1 M HCl for 5 min; B) polished with an abrasive paper (1200 mesh). Insert: magnified views.

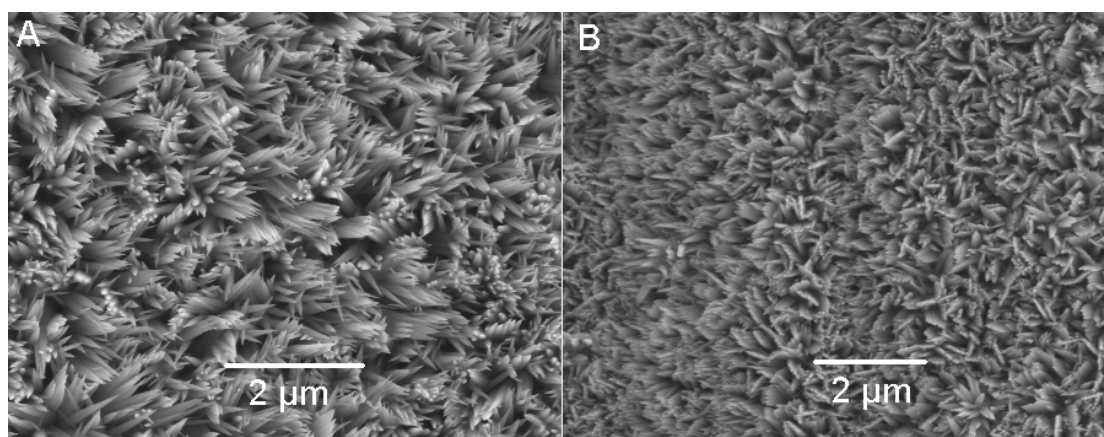

**Figure S7.** SEM images of a zinc foil freshly pretreated by two different methods after reaction at 30 °C for 5 h. A) treated with 1 M HCl for 5 min; B) polished with an abrasive paper (1200 mesh).
